# Supplementary material for: Polylactic Acid/Polyaniline Nanofibers Subjected to Pre- and Post-Electrospinning Plasma Treatments for Refined Scaffold-Based Nerve Tissue Engineering Applications
Source: MDPI journal article supplement (doi:10.3390/polym15010072), 2022-12-24
Supplement: s1 [file s1]

Supplementary Material for

**Polylactic acid/polyaniline nanofibers subjected to pre- and post-electrospinning plasma treatments for refined scaffold-based nerve tissue engineering applications**

Yongjian Guo\*, Rouba Ghobeira, Sheida Aliakbarshirazi, Rino Morent, and Nathalie De Geyter

Department of Applied Physics, Research Unit Plasma Technology (RUPT), Faculty of Engineering & Architecture, Ghent University, Sint-Pietersnieuwstraat 41, B4, 9000 Ghent, Belgium

\*Corresponding author: [yongjian.guo@ugent.be](mailto:yongjian.guo@ugent.be)

|                         | PLA                                                                                         | PLA/PAni                                                                                    | PLA/PAni:CSA                                                                                  |
|-------------------------|---------------------------------------------------------------------------------------------|---------------------------------------------------------------------------------------------|-----------------------------------------------------------------------------------------------|
| Untreated               | 144.8°<br> | 138.2°<br> | 139.4°<br> |
| APPJ                    | 130.5°<br> | 129.5°<br> | 128.2°<br> |
| APPJ/DBD <sub>15s</sub> | 25.2°<br>  | 22.9°<br>  | 20.5°<br>  |

**Figure S1** Representative WCA images of untreated, APPJ-treated and APPJ/DBD-treated (DBD treatment time: 15 s) PLA, PLA/PAni, and PLA/PAni:CSA scaffolds.

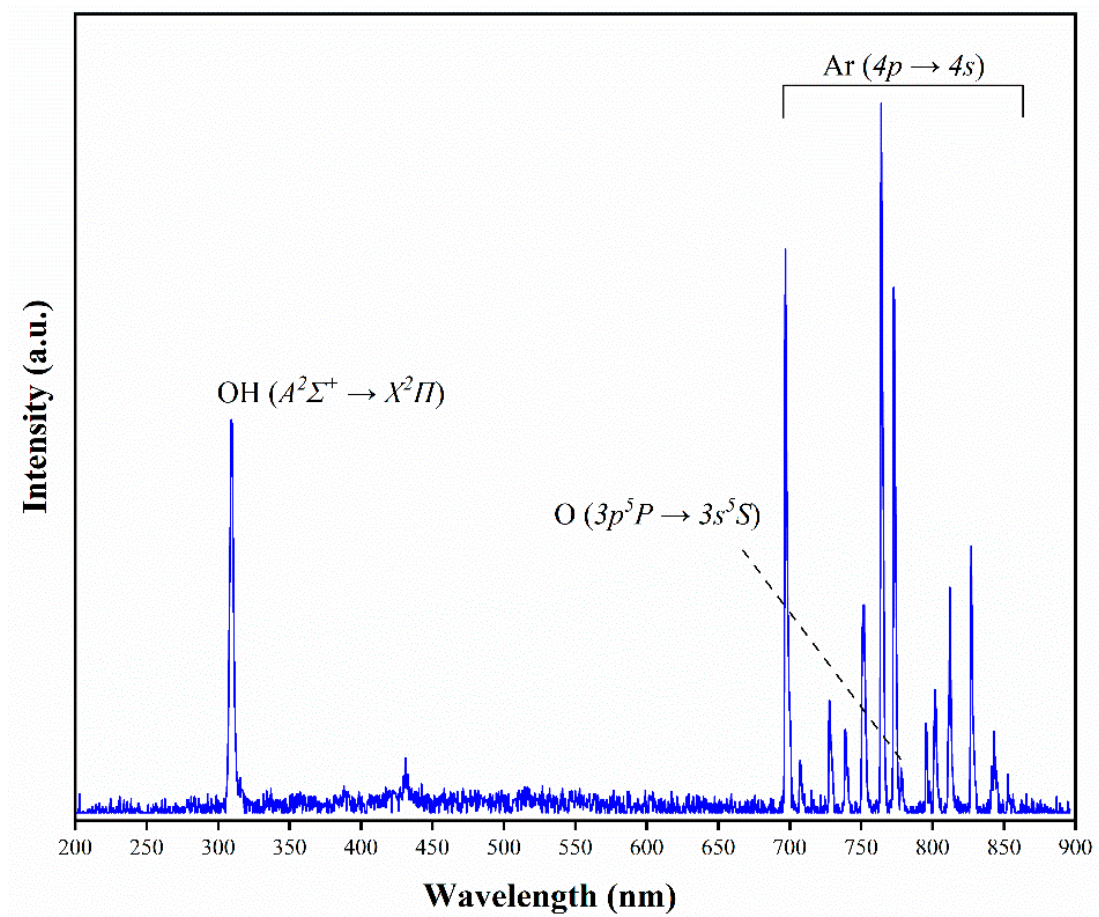

**Figure S2** Optical emission spectrum of the argon plasma jet (APPJ) in CHL:DMF (8:2 v/v).

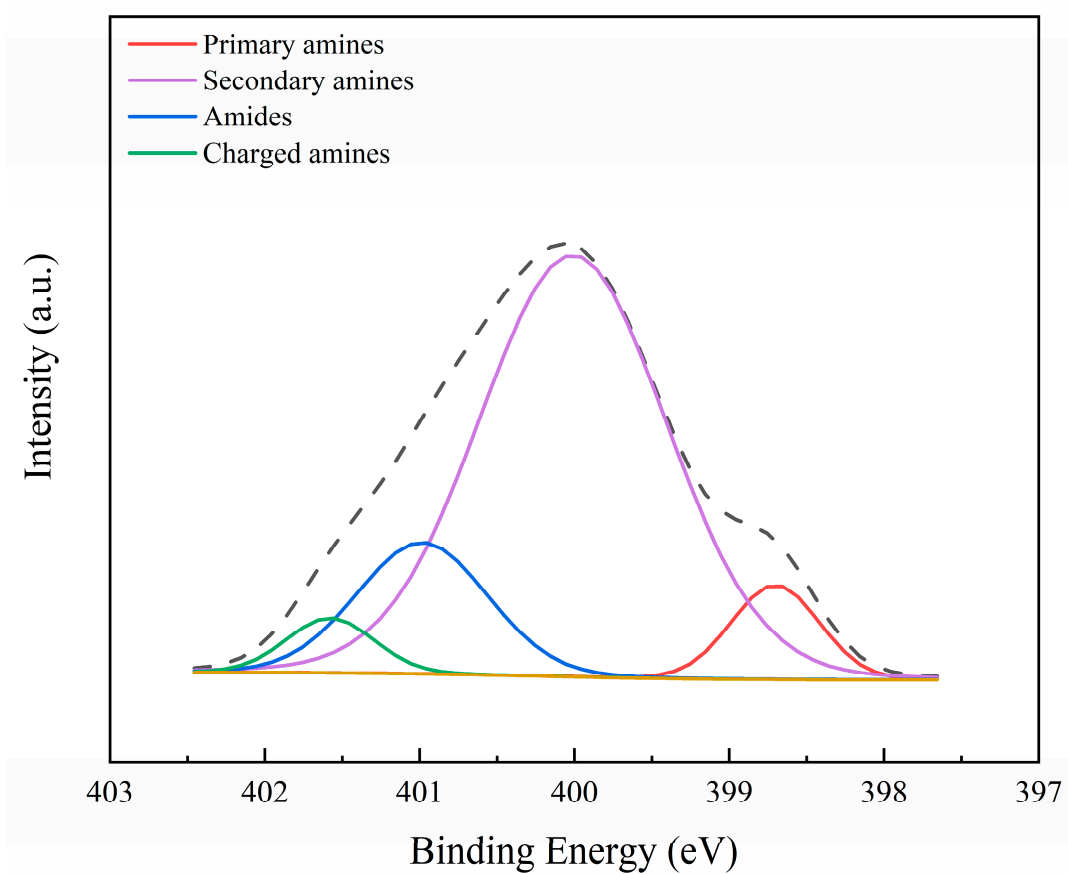

**Figure S3** Example of an N1s curve fitting of APPJ/DBD-treated PLA.

**Table S1**

Relative concentrations (%) of nitrogen-containing functional groups of APPJ/DBD-treated PLA nanofibers.

| Peak          | primary amines<br>(398.7 eV) | secondary amines<br>(400.0 eV) | amides<br>(400.9 eV) | charged amines<br>(401.6 eV) |
|---------------|------------------------------|--------------------------------|----------------------|------------------------------|
| Concentration | 7.4 ± 6.0                    | 68.3 ± 10.4                    | 16.2 ± 9.7           | 8.0 ± 6.2                    |

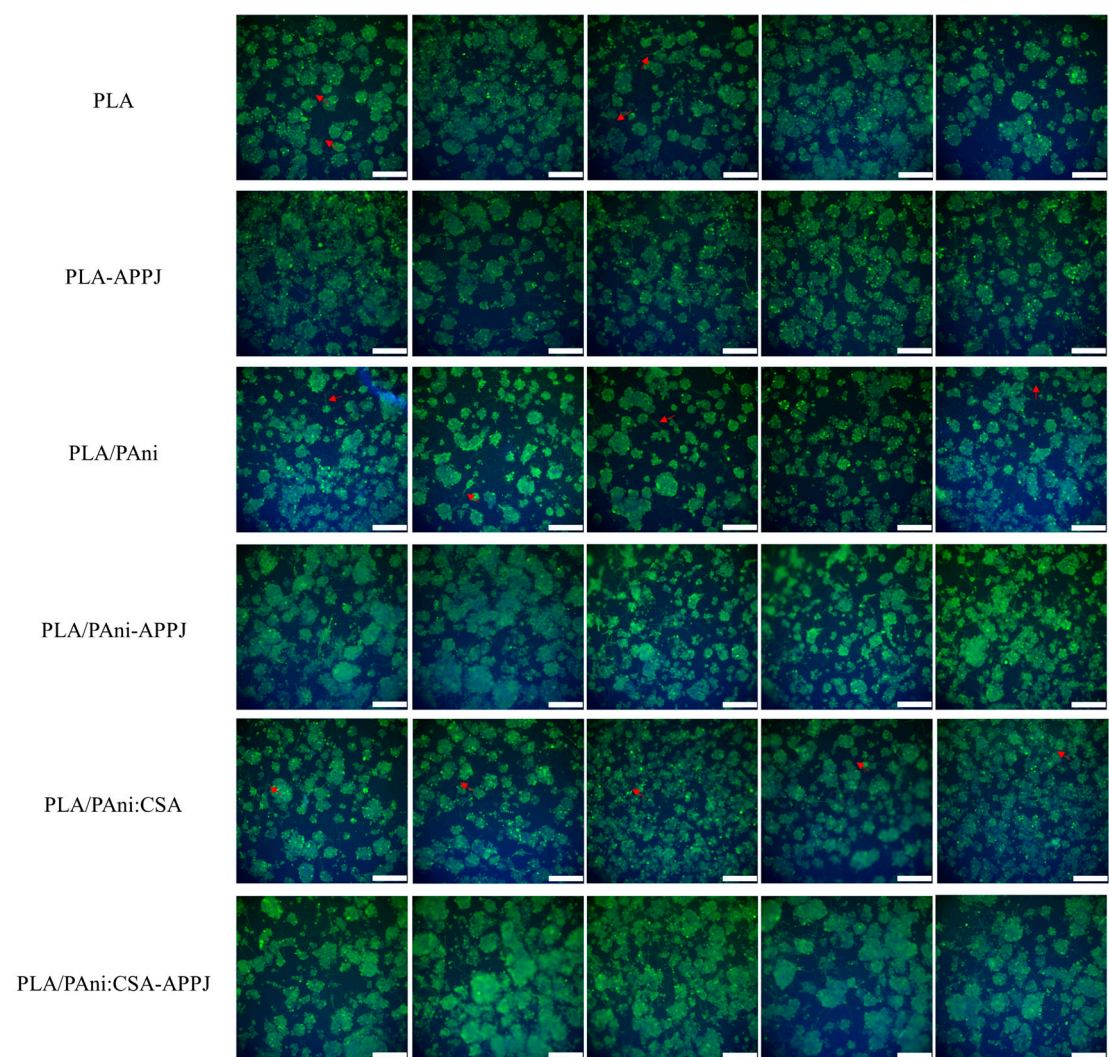

**Figure S4** Fluorescence microscopy images of PC-12 cells cultured on DBD-treated nanofibers for 10 days (Scale bar: 500  $\mu\text{m}$ ).

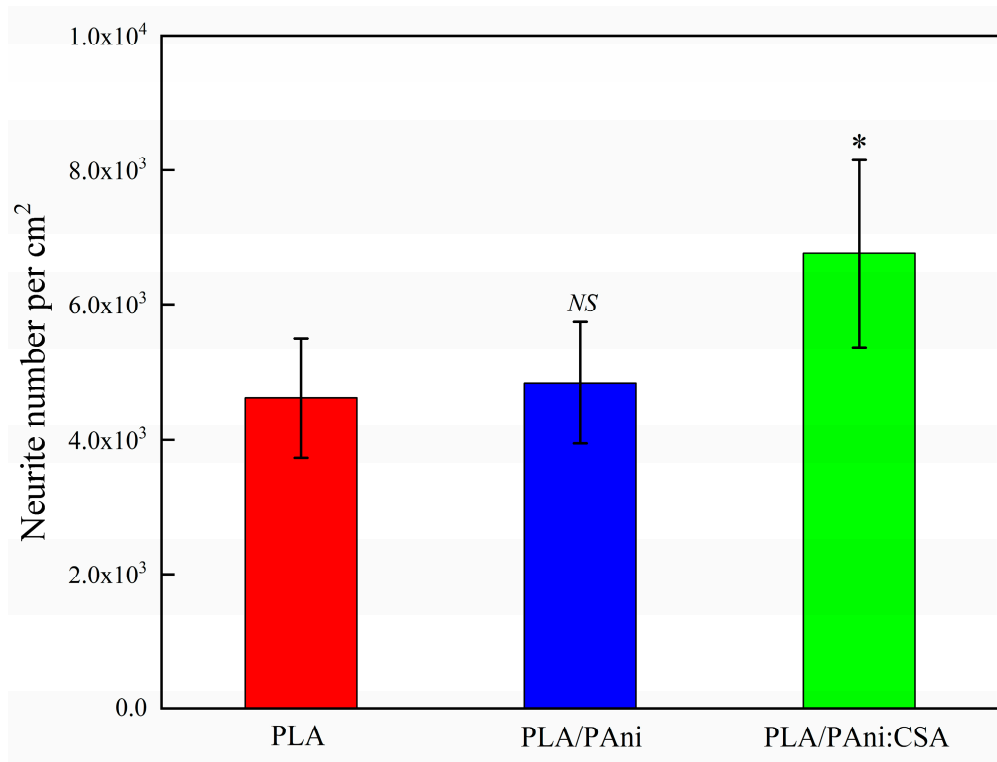

**Figure S5** Density of extended neurites from PC-12 cells cultured on PLA, PLA/PAni and PLA/PAni:CSA scaffolds,  $n \geq 5$ ,  $*p < 0.05$  compared to PLA scaffolds, *NS*: not significant compared to PLA scaffolds.
